# Supplementary material for: Dry Eye and Phacoemulsification Cataract Surgery: A Systematic Review and Meta-Analysis
Source: Front Med (Lausanne). 2021 Jul 8;8:649030. doi: 10.3389/fmed.2021.649030 (PMC8295542; doi:10.3389/fmed.2021.649030)
Supplement: Supplementary file 2 [file Table_2.XLSX]

## Sheet: 1
问卷
studyid	study	year	number	subgroup	DM	nation	design	incision	mean1	sd1	mean2	sd2	r
3	Kyung Eun Han	2014	58	1	3	1	3	3.2	1.5	1.1	3.6	1.1	0.33
4	Peng Song	2019	51	1	1	2	1		2.24	1.27	4.63	1.3	0.33
1	Ji Won Jung	2016	50	1	3	1	2	2.8	13.196	9.85532	23.613	13.3216	0.33
2	Jin Sun Kim	2016	43	1	1	1	3		25.64	12	39.04	10.14	0.33
13	Donghong Jiang	2016	568	2	2	2	2	3.6	0.2	0.1	0.99537	0.852803	0.33
9	Dewang Shao	2018	150	2	1	2	1	2.2	0.47	0.39	1.83	0.71	0.33
19	Taehoon Oh	2012	48	2	3	1	3	2.8	0.84	1.2	1.82	1.45	0.33
5	Yuli Park	2016	34	2	3	1	2	2.85	1.01059	0.580096	2.25412	0.826451	0.33
17	MA Sanchez	2010	21	2	1	3	2		8.7	5	11.5	8.2	0.33
18	Maierhaba Yusufu	2017	30	2	2	2	2	2.6	8.78	10.0265	16.64	14.1721	0.33
16	Kensaku Miyake	2017	433	2	3	6	3	2.32	8.8	5.5	4.5	4.6	0.33
10	Maria Garcia Zamora	2020	55	2	3	3	3	2.75	10.98	5.05	11.09	4.03	0.33
8	Young Joon Choi	2018	116	2	3	1	3	2.8	14.84	15.4	13.08	15.25	0.33
14	Hoseok Moon	2014	29	2	3	1	2	2.75	16.8	12.6	15.1	10.1	0.33
20	Yinhui Yu	2015	64	2	1	2	2		23.686	5.828	7.991	4.879	0.31
11	A. El Ameen	2018	30	2	3	5	3	1.8	26.2	15.9	23.7	18.1	0.33
12	Ana Gonzalez-Mesa	2016	52	2	3	3	3	2.75	26.34	18.15	13.35	13.17	0.33
6	Do Yeh Yoon	2019	11	2	1	1	2	2.2	27.1	17.2	21.3	18.6	0.33
7	Hun Lee	2016	33	2	3	1	4		34.52	25.71	31.7	16.21	0.33
15	Ke Yao	2015	90	2	2	2	2		44.8	20.9	14.2	13.8	0.35
BUT
studyid	study	year	number	subgroup	DM	nation	design	incision	mean1	sd1	mean2	sd2	r
1	Ji Won Jung	2016	50	1	3	1	2	2.8	5.56	2.85928	2.78	2.72014	0.35
2	Jin Sun Kim	2016	43	1	1	1	3		5.81	1.89	3.84	0.97	0.35
3	Kyung Eun Han	2014	58	1	3	1	3	3.2	6.7	3	4.2	1.9	0.35
4	Peng Song	2019	51	1	1	2	1		4.41	1.22	1.2	0.96	0.35
12	A. El Ameen	2018	30	2	3	5	3	1.8	9.4	7.8	6.4	4.9	0.35
10	Dewang Shao	2018	150	2	1	2	1	2.2	11.04	1.24	10.89	1.57	0.35
6	Do Yeh Yoon	2019	11	2	1	1	2	2.2	3.1	2.2	4.1	1.7	0.35
13	Donghong Jiang	2016	568	2	2	2	2	3.6	8.58519	3.8405	8.24815	3.59226	0.35
14	Hoseok Moon	2014	29	2	3	1	2	2.75	10.3	4.6	10.2	4.2	0.35
7	Hun Lee	2016	33	2	3	1	4		3.97	1.3	4.45	2.23	0.35
15	Ke Yao	2015	90	2	2	2	2		7.2	4.1	6.7	4.8	0.52
16	Kensaku Miyake	2017	433	2	3	6	3	2.32	4.75	2.63	4.5	2.67	0.35
17	MA Sanchez	2010	21	2	1	3	2		6.2	0.81	6.4	0.7	0.35
18	Maierhaba Yusufu	2017	30	2	2	2	2	2.6	9.48	6.43042	8.74	5.93209	0.35
11	Maria Garcia Zamora	2020	55	2	3	3	3	2.75	8.78	2.97	7.05	2.86	0.35
8	Rita Mencucci	2015	136	2	3	4	1	2.2	9.8	3	9.3	3.6	0.35
19	Taehoon Oh	2012	48	2	3	1	3	2.8	9.2	3.2	8.7	4.1	0.35
20	Yinhui Yu	2015	64	2	1	2	2		5.024	2.785	4.841	3.442	0.18
9	Young Joon Choi	2018	116	2	3	1	3	2.8	5.38	2.09	5.03	2.16	0.35
5	Yuli Park	2016	34	2	3	1	2	2.85	8.57647	5.01238	8.26471	5.25299	0.35
CFS
studyid	study	year	number	subgroup	DM	nation	design	incision	mean1	sd1	mean2	sd2	r
3	Peng Song	2019	51	1	1	2	1		0.59	0.7	1.31	1.03	0.38
1	Ji Won Jung	2016	50	1	3	1	2	2.8	2.19	2.13018	3.3	3.3	0.38
2	Jin Sun Kim	2016	43	1	1	1	3		3.42	2.49	4.11	2.85	0.38
9	Maria Garcia Zamora	2020	55	2	3	3	3	2.75	0	0	0.49	0.76	0.38
11	Ana Gonzalez-Mesa	2016	52	2	3	3	3	2.75	0.39	1.17	0.18	0.75	0.38
8	Dewang Shao	2018	150	2	1	2	1	2.2	0.475	0.275	0.6	0.175	0.38
4	Yuli Park	2016	34	2	3	1	2	2.85	0.982353	0.630522	0.870588	0.618664	0.38
15	MA Sanchez	2010	21	2	1	3	2		0.99	1.44	0.57	1.2	0.38
17	Yinhui Yu	2015	64	2	1	2	2		1.08	1.452	1.17	1.659	0.11
12	Donghong Jiang	2016	568	2	2	2	2	3.6	1.12685	0.800611	1.42685	0.728916	0.38
10	A. El Ameen	2018	30	2	3	5	3	1.8	1.2	1.5	1.8	1.8	0.38
5	Do Yeh Yoon	2019	11	2	1	1	2	2.2	1.5	2	1	2	0.38
14	Kensaku Miyake	2017	433	2	3	6	3	2.32	2.5005	2.3338	2.66667	2.1671	0.38
16	Maierhaba Yusufu	2017	30	2	2	2	2	2.6	2.73333	5.65111	5.2	6.43214	0.38
13	Ke Yao	2015	90	2	2	2	2		2.8339	4.3342	2.0004	3.1673	0.64
6	Hun Lee	2016	33	2	3	1	4		3	2.4	2.22	2.31	0.38
7	Young Joon Choi	2018	116	2	3	1	3	2.8	3.63	3.66	2.07	3.12	0.38
Schirmer
studyid	study	year	number	subgroup	DM	nation	design	incision	mean1	sd1	mean2	sd2	r
3	Dewang Shao	2018	150	2	1	2	1	2.2	9.37	3.98	8.04	2.73	0.74
1	Jin Sun Kim	2016	43	1	1	1	3		9.67	3.37	8.51	2.43	0.74
2	Peng Song	2019	51	1	1	2	1		6.08	2	6.59	2.09	0.74
4	Yinhui Yu	2015	64	2	1	2	2		9.42	7.352	8.55	6.942	0.74
5	Donghong Jiang	2016	568	2	2	2	2	3.6	10.3269	2.84596	9.96574	2.58116	0.74
6	Maierhaba Yusufu	2017	30	2	2	2	2	2.6	12.6467	6.02782	11.52	6.28125	0.74
10	Hun Lee	2016	33	2	3	1	4		9.92	3.36	9.58	3.35	0.74
7	Ji Won Jung	2016	50	1	3	1	2	2.8	7.52	4.40185	8.14	3.86	0.74
13	Kensaku Miyake	2017	433	2	3	6	3	2.32	11.8	9	12.3	9.9	0.74
8	Kyung Eun Han	2014	58	1	3	1	3	3.2	10	3.8	10.9	7	0.74
12	Maria Garcia Zamora	2020	55	2	3	3	3	2.75	9.05	3.63	8.32	3.58	0.74
14	Taehoon Oh	2012	48	2	3	1	3	2.8	10.9	4.5	11.8	4.1	0.74
11	Young Joon Choi	2018	116	2	3	1	3	2.8	9.37	4.94	9.51	4.86	0.74
9	Yuli Park	2016	34	2	3	1	2	2.85	10.8882	7.40171	10.0059	6.87677	0.74
studyid	study	year	number	subgroup	DM	nation	design	incision	mean1	sd1	mean2	sd2	r
4	Donghong Jiang	2016	568	2	2	2	2	3.6	10.3269	2.84596	9.96574	2.58116	0.7
5	Maierhaba Yusufu	2017	30	2	2	2	2	2.6	12.6467	6.02782	11.52	6.28125	0.7
2	Dewang Shao	2018	150	2	1	2	1	2.2	9.37	3.98	8.04	2.73	0.7
1	Jin Sun Kim	2016	43	1	1	1	3		9.67	3.37	8.51	2.43	0.7
3	Yinhui Yu	2015	64	2	1	2	2		9.42	7.352	8.55	6.942	0.7
9	Hun Lee	2016	33	2	3	1	4		9.92	3.36	9.58	3.35	0.7
6	Ji Won Jung	2016	35	1	3	1	2	2.8	8	4.7	8.5	3.8	0.7
12	Kensaku Miyake	2017	433	2	3	6	3	2.32	11.8	9	12.3	9.9	0.7
7	Kyung Eun Han	2014	58	1	3	1	3	3.2	10	3.8	10.9	7	0.7
11	Maria Garcia Zamora	2020	55	2	3	3	3	2.75	9.05	3.63	8.32	3.58	0.7
13	Taehoon Oh	2012	48	2	3	1	3	2.8	10.9	4.5	11.8	4.1	0.7
10	Young Joon Choi	2018	116	2	3	1	3	2.8	9.37	4.94	9.51	4.86	0.7
8	Yuli Park	2016	34	2	3	1	2	2.85	10.8882	7.40171	10.0059	6.87677	0.7
睑缘评分
studyid	study	year	number	subgroup	DM	nation	design	incision	mean1	sd1	mean2	sd2	r
1	Jin Sun Kim	2016	43	1	1	1	3		1.91	1.02	2.19	1.01	0.3
2	Kyung Eun Han	2014	58	1	3	1	3	3.2	1.5	1.1	2.1	1.1	0.3
3	Peng Song	2019	51	1	1	2	1		2.47	0.5	3.25	0.72	0.3
5	Young Joon Choi	2018	116	2	3	1	3	2.8	1.74	0.95	1.47	0.83	0.3
4	Yuli Park	2016	34	2	3	1	2	2.85	1.08235	0.641244	1.45294	1.01077	0.3
睑脂表达质量
studyid	study	year	number	subgroup	DM	nation	design	incision	mean1	sd1	mean2	sd2	r
1	Jin Sun Kim	2016	43	1	1	1	3		9.67	4.82	12.49	3.98	0.3
2	Peng Song	2019	51	1	1	2	1		12.24	5.32	17	4.08	0.3
3	Yuli Park	2016	34	2	3	1	2	2.85	1.44706	0.862602	1.77059	1.23669	0.3
4	Young Joon Choi	2018	116	2	3	1	3	2.8	8.16	4.63	8.96	4.47	0.3
睑脂表达量
studyid	study	year	number	subgroup	DM	nation	design	incision	mean1	sd1	mean2	sd2	r
1	Jin Sun Kim	2016	43	1	1	1	3		0.56	0.59	0.86	0.8	0.3
3	Peng Song	2019	51	1	1	2	1		1.48	0.41	2.01	0.44	0.3
6	A. El Ameen	2018	30	2	3	5	3	1.8	0.8	0.7	1.27	0.9	0.3
2	Kyung Eun Han	2014	58	1	3	1	3	3.2	1.7	0.8	1.8	0.8	0.3
5	Young Joon Choi	2018	116	2	3	1	3	2.8	0.82	0.64	0.92	0.65	0.3
4	Yuli Park	2016	34	2	3	1	2	2.85	1.24118	0.820243	1.50588	1.02955	0.3
睑板腺缺失评分
studyid	study	year	number	subgroup	DM	nation	design	incision	mean1	sd1	mean2	sd2	r	SM
1	Kyung Eun Han	2014	58	1	3	1	3	3.2	1.5	1.5	1.7	1.8	0.3	1
3	Yuli Park	2016	34	2	3	1	2	2.85	0.658824	0.529218	1.12353	0.659457	0.3	1.2449
5	A. El Ameen	2018	30	2	3	5	3	1.8	25.7	14.8	28.2	15.3	0.3	1.73649
2	Peng Song	2019	51	1	1	2	1		2.63	0.7	2.71	0.64	0.3	3.75714
4	Young Joon Choi	2018	116	2	3	1	3	2.8	47.78	7.91	45.87	7.98	0.3	6.04046

## Sheet: Sheet1
questionnaire
studyid	study	year	number	subgroup	DM	nation	design	incision	mean1	sd1	mean2	sd2	r
3	Kyung Eun Han	2014	58	1	3	1	3	3.2	1.5	1.1	3.6	1.1	0.33
1	Ji Won Jung	2016	50	1	3	1	2	2.8	13.196	9.85532	23.613	13.3216	0.33
2	Jin Sun Kim	2016	43	1	1	1	3		25.64	12	39.04	10.14	0.33
13	Donghong Jiang	2016	568	2	2	2	2	3.6	0.2	0.1	0.99537	0.852803	0.33
9	Dewang Shao	2018	150	2	1	2	1	2.2	0.47	0.39	1.83	0.71	0.33
19	Taehoon Oh	2012	48	2	3	1	3	2.8	0.84	1.2	1.82	1.45	0.33
5	Yuli Park	2016	34	2	3	1	2	2.85	1.01059	0.580096	2.25412	0.826451	0.33
17	MA Sanchez	2010	21	2	1	3	2		8.7	5	11.5	8.2	0.33
18	Maierhaba Yusufu	2017	30	2	2	2	2	2.6	8.78	10.0265	16.64	14.1721	0.33
16	Kensaku Miyake	2017	433	2	3	6	3	2.32	8.8	5.5	4.5	4.6	0.33
10	Maria Garcia Zamora	2020	55	2	3	3	3	2.75	10.98	5.05	11.09	4.03	0.33
8	Young Joon Choi	2018	116	2	3	1	3	2.8	14.84	15.4	13.08	15.25	0.33
14	Hoseok Moon	2014	29	2	3	1	2	2.75	16.8	12.6	15.1	10.1	0.33
20	Yinhui Yu	2015	64	2	1	2	2		23.686	5.828	7.991	4.879	0.31
11	A. El Ameen	2018	30	2	3	5	3	1.8	26.2	15.9	23.7	18.1	0.33
12	Ana Gonzalez-Mesa	2016	52	2	3	3	3	2.75	26.34	18.15	13.35	13.17	0.33
6	Do Yeh Yoon	2019	11	2	1	1	2	2.2	27.1	17.2	21.3	18.6	0.33
7	Hun Lee	2016	33	2	3	1	4		34.52	25.71	31.7	16.21	0.33
15	Ke Yao	2015	90	2	2	2	2		44.8	20.9	14.2	13.8	0.35
BUT
studyid	study	year	number	subgroup	DM	nation	design	incision	mean1	sd1	mean2	sd2	r
1	Ji Won Jung	2016	50	1	3	1	2	2.8	5.56	2.85928	2.78	2.72014	0.35
2	Jin Sun Kim	2016	43	1	1	1	3		5.81	1.89	3.84	0.97	0.35
3	Kyung Eun Han	2014	58	1	3	1	3	3.2	6.7	3	4.2	1.9	0.35
12	A. El Ameen	2018	30	2	3	5	3	1.8	9.4	7.8	6.4	4.9	0.35
10	Dewang Shao	2018	150	2	1	2	1	2.2	11.04	1.24	10.89	1.57	0.35
6	Do Yeh Yoon	2019	11	2	1	1	2	2.2	3.1	2.2	4.1	1.7	0.35
13	Donghong Jiang	2016	568	2	2	2	2	3.6	8.58519	3.8405	8.24815	3.59226	0.35
14	Hoseok Moon	2014	29	2	3	1	2	2.75	10.3	4.6	10.2	4.2	0.35
7	Hun Lee	2016	33	2	3	1	4		3.97	1.3	4.45	2.23	0.35
15	Ke Yao	2015	90	2	2	2	2		7.2	4.1	6.7	4.8	0.52
16	Kensaku Miyake	2017	433	2	3	6	3	2.32	4.75	2.63	4.5	2.67	0.35
17	MA Sanchez	2010	21	2	1	3	2		6.2	0.81	6.4	0.7	0.35
18	Maierhaba Yusufu	2017	30	2	2	2	2	2.6	9.48	6.43042	8.74	5.93209	0.35
11	Maria Garcia Zamora	2020	55	2	3	3	3	2.75	8.78	2.97	7.05	2.86	0.35
8	Rita Mencucci	2015	136	2	3	4	1	2.2	9.8	3	9.3	3.6	0.35
19	Taehoon Oh	2012	48	2	3	1	3	2.8	9.2	3.2	8.7	4.1	0.35
20	Yinhui Yu	2015	64	2	1	2	2		5.024	2.785	4.841	3.442	0.18
9	Young Joon Choi	2018	116	2	3	1	3	2.8	5.38	2.09	5.03	2.16	0.35
5	Yuli Park	2016	34	2	3	1	2	2.85	8.57647	5.01238	8.26471	5.25299	0.35
CFS
studyid	study	year	number	subgroup	DM	nation	design	incision	mean1	sd1	mean2	sd2	r
1	Ji Won Jung	2016	50	1	3	1	2	2.8	2.19	2.13018	3.3	3.3	0.38
2	Jin Sun Kim	2016	43	1	1	1	3		3.42	2.49	4.11	2.85	0.38
9	Maria Garcia Zamora	2020	55	2	3	3	3	2.75	0	0	0.49	0.76	0.38
11	Ana Gonzalez-Mesa	2016	52	2	3	3	3	2.75	0.39	1.17	0.18	0.75	0.38
8	Dewang Shao	2018	150	2	1	2	1	2.2	0.475	0.275	0.6	0.175	0.38
4	Yuli Park	2016	34	2	3	1	2	2.85	0.982353	0.630522	0.870588	0.618664	0.38
15	MA Sanchez	2010	21	2	1	3	2		0.99	1.44	0.57	1.2	0.38
17	Yinhui Yu	2015	64	2	1	2	2		1.08	1.452	1.17	1.659	0.11
12	Donghong Jiang	2016	568	2	2	2	2	3.6	1.12685	0.800611	1.42685	0.728916	0.38
10	A. El Ameen	2018	30	2	3	5	3	1.8	1.2	1.5	1.8	1.8	0.38
5	Do Yeh Yoon	2019	11	2	1	1	2	2.2	1.5	2	1	2	0.38
14	Kensaku Miyake	2017	433	2	3	6	3	2.32	2.5005	2.3338	2.66667	2.1671	0.38
16	Maierhaba Yusufu	2017	30	2	2	2	2	2.6	2.73333	5.65111	5.2	6.43214	0.38
13	Ke Yao	2015	90	2	2	2	2		2.8339	4.3342	2.0004	3.1673	0.64
6	Hun Lee	2016	33	2	3	1	4		3	2.4	2.22	2.31	0.38
7	Young Joon Choi	2018	116	2	3	1	3	2.8	3.63	3.66	2.07	3.12	0.38
Schirmer
studyid	study	year	number	subgroup	DM	nation	design	incision	mean1	sd1	mean2	sd2	r
5	Donghong Jiang	2016	568	2	1	2	2	3.6	10.3269	2.84596	9.96574	2.58116	0.7
6	Maierhaba Yusufu	2017	30	2	1	2	2	2.6	12.6467	6.02782	11.52	6.28125	0.7
3	Dewang Shao	2018	150	2	2	2	1	2.2	9.37	3.98	8.04	2.73	0.7
1	Jin Sun Kim	2016	43	1	2	1	3		9.67	3.37	8.51	2.43	0.7
4	Yinhui Yu	2015	64	2	2	2	2		9.42	7.352	8.55	6.942	0.74
10	Hun Lee	2016	33	2	3	1	4		9.92	3.36	9.58	3.35	0.7
7	Ji Won Jung	2016	50	1	3	1	2	2.8	7.52	4.40185	8.14	3.86	0.7
13	Kensaku Miyake	2017	433	2	3	6	3	2.32	11.8	9	12.3	9.9	0.7
8	Kyung Eun Han	2014	58	1	3	1	3	3.2	10	3.8	10.9	7	0.7
12	Maria Garcia Zamora	2020	55	2	3	3	3	2.75	9.05	3.63	8.32	3.58	0.7
14	Taehoon Oh	2012	48	2	3	1	3	2.8	10.9	4.5	11.8	4.1	0.7
11	Young Joon Choi	2018	116	2	3	1	3	2.8	9.37	4.94	9.51	4.86	0.7
9	Yuli Park	2016	34	2	3	1	2	2.85	10.8882	7.40171	10.0059	6.87677	0.7
